# Supplementary material for: Utilising hardly-water soluble substrates as a second phase enables the straightforward synthesis of chiral alcohols
Source: Royal Society of Chemistry journal article supplement (doi:10.1039/c1gc15823f), 2011-01-01
Supplement: c1gc15823f.pdf [file c1gc15823f.pdf]

## Utilising hardly water soluble substrates as second phase enables straightforward syntheses of chiral alcohols

Christina Kohlmann, Nora Robertz, Susanne Leuchs,

Lasse Greiner\*, Shukralla Na'amnieh

### Experimental

Alcohol dehydrogenase from *Lactobacillus brevis* (LbADH) and glucose dehydrogenase from *Bacillus spec.* (GDH) are available from X-Zyme GmbH (Düsseldorf, Germany). NADP<sup>+</sup> was provided by Carl Roth GmbH (Karlsruhe, Germany) and N-methyl-N-trimethylsilyl-trifluoroacetamide (N-MSTFA) from CS-Chromatographie Service GmbH (Langerwehe, Germany). All other reagents were purchased from Sigma Aldrich (Schnelldorf, Germany), and were at least of analytical grade. Batch experiments were performed in 10 mL glass vials with screw caps and teflonated sealings (Th. Geyer, Germany).

Potassium buffer (100 mmol, pH 7) was used throughout and prepared by dissolving K<sub>2</sub>HPO<sub>4</sub> (12.63 g, 72.5 mmol) and KH<sub>2</sub>PO<sub>4</sub> (3.76 g, 27.6 mmol) in 1000 mL water and MgCl<sub>2</sub> (238 mg, 2.5 mmol) was added.

For the batch experiments glucose (238 mg, 1.20 mmol or 301 mg, 1.52 mmol), LbADH (0.5 mg lyophilisate, 0.079 mg protein) and GDH (5 mg lyophilisate, 1.36 mg protein) were dissolved in 7.9 mL buffer. To maintain constant pH CaCO<sub>3</sub> (128 mg, 1.28 mmol or 256 mg, 2.56 mmol) was added. The ketones were added by weight. With the addition of NADP<sup>+</sup> (0.63 mg, 0.8 μmol in 100 μL buffer) the reaction was started. Reactions were carried out at 30°C and shaken at 150 rpm (Thermomixer, Eppendorf). Analytical samples of typically 200 μL were withdrawn, extracted with hexane for quantitative recovery and analysed via GC (column: Chirasil-Dex (25 m x 0.25 mm ID) from Varian GC Capillary Columns, carrier gas: H<sub>2</sub>, 0.4 bar).

#### ***Determination of reaction progresses:***

3-octanone/3-octanol: 90 °C (2 min), 5 °C min<sup>-1</sup> to 130 °C (2 min), 40 °C min<sup>-1</sup> to 180 °C (2 min). Retention times: 3-octanone (6.2 min), 3-octanol (10.3 min), internal standard 1-octanol (10.3 min).

2-octanone/2-octanol: 80 °C (3 min), 10 °C min<sup>-1</sup> to 120 °C (6 min), 40 °C min<sup>-1</sup> to 180 °C (2 min). Retention times: 2-octanone (7.3 min), 2-octanol (9.4 min), internal standard 1-octanol (11.8 min).

2-nonanon/2-nonanol: 110 °C (0 min), 2 °C min<sup>-1</sup> to 120 °C (0 min), 40 °C min<sup>-1</sup> to 180 °C (2 min). Retention times: 2-nonanonone (5.5 min), 2-nonanol (6.4 min), internal standard 1-octanol (6.3 min).

2-decanon/2-decanol: 120 °C (2 min), 3 °C min<sup>-1</sup> to 150 °C (0 min), 40 °C min<sup>-1</sup> to 180 °C (2 min). Retention times: 2-decanone (6.7 min), 2-decanol (8.7 min), internal standard 1-octanol (5.9 min).

### ***Determination of enantiomeric excess:***

Samples were treated as follows: the organic sample (250  $\mu\text{L}$ ) was mixed with N-MSTFA (50  $\mu\text{L}$ ) and heated to 80  $^{\circ}\text{C}$  for 30 min.

*(R)*-/*(S)*-3-octanol: 60  $^{\circ}\text{C}$  (51 min), 40  $^{\circ}\text{C min}^{-1}$  to 180  $^{\circ}\text{C}$  (2 min). Retention times: (*R*)-3-octanol (47.1 min), (*S*)-3-octanol (48.4 min).

*(R)*-/*(S)*-2-octanol: 80  $^{\circ}\text{C}$  (3 min), 1  $^{\circ}\text{C min}^{-1}$  to 100  $^{\circ}\text{C}$  (5 min), 40  $^{\circ}\text{C min}^{-1}$  to 180  $^{\circ}\text{C}$  (2 min). Retention times: (*R*)-2-octanol (14.9 min), (*S*)-2-octanol (15.2 min).

*(R)*-/*(S)*-2-nonanol: 75  $^{\circ}\text{C}$  (60 min), 40  $^{\circ}\text{C min}^{-1}$  to 180  $^{\circ}\text{C}$  (2 min). Retention times: (*R*)-2-nonanol (55.0 min), (*S*)-2-nonanol (56.6 min).

*(R)*-/*(S)*-2-decanol: 80  $^{\circ}\text{C}$  (92 min), 40  $^{\circ}\text{C min}^{-1}$  to 180  $^{\circ}\text{C}$  (2 min). Retention times: (*R*)-2-decanol (86.0 min), (*S*)-2-decanol (87.7 min).
